# Supplementary material for: Organizational agility: ill-defined and somewhat confusing? A systematic literature review and conceptualization
Source: Springer Nature journal article supplement (doi:10.1007/s11301-020-00186-6), 2020-04-19
Supplement: MOESM1 [file 17908822]

**Table 1** Allocation of identified research papers to academic journals

| **ID** | **Academic journal** | **VHB rating** | **No. of identified papers** | **Duplicates reduced** | **Contextually relevant (title + abstract)** | **Contextually relevant (complete article)** | **Percen-tage share** |
| --- | --- | --- | --- | --- | --- | --- | --- |
| 1 | Management Information Systems Quarterly | A+ | 8 | 3 | 3 | 3 |  |
| 2 | Information Systems Research (ISR) | A+ | 5 | 2 | 2 | 2 |  |
|  |  | A+ | 13 | 5 | 5 | 5 | 4% |
| 3 | IIE Transactions | A | 20 | 14 | 8 | 5 |  |
| 4 | European Journal of Information Systems (EJIS) | A | 8 | 8 | 8 | 3 |  |
| 5 | Journal of Operations Management | A | 7 | 6 | 3 | 3 |  |
| 6 | Journal of Information Technology | A | 2 | 1 | 1 | 0 |  |
|  |  | A | 37 | 29 | 20 | 11 | 16% |
| 7 | International Journal of Production Research | B | 37 | 36 | 29 | 21 |  |
| 8 | International Journal of Production Economics | B | 68 | 34 | 23 | 11 |  |
| 9 | International Journal of Operations & Production Management | B | 16 | 16 | 12 | 10 |  |
| 10 | California Management Review | B | 9 | 9 | 9 | 1 |  |
| 11 | Computers and Industrial Engineering | B | 6 | 6 | 5 | 3 |  |
| 12 | Communications of the ACM (CACM) | B | 10 | 5 | 4 | 0 |  |
| 13 | IEEE Transactions on Engineering Management | B | 4 | 2 | 2 | 2 |  |
| 14 | International Journal of Physical Distribution & Logistics Management | B | 8 | 6 | 1 | 1 |  |
| 15 | Group Decision and Negotiation | B | 2 | 1 | 1 | 1 |  |
| 16 | Journal of Cleaner Production | B | 2 | 1 | 1 | 1 |  |
|  |  | B | 162 | 116 | 87 | 51 | 71% |
| 17 | Benchmarking: An International Journal | C | 7 | 7 | 6 | 6 |  |
| 18 | IEEE Software | C | 10 | 4 | 3 | 0 |  |
| 19 | International Journal of Technology Management | C | 4 | 2 | 2 | 2 |  |
| 20 | IEEE Transactions on Systems, Man, and Cybernetics: Systems | C | 2 | 1 | 0 | 0 |  |
|  |  | C | 16 | 14 | 11 | 8 | 9% |
|  | **Total** |  | **228** | **157** | **123** | **75** | **100%** |
